# Supplementary material for: Chemical derivatization coupled with matrix assisted laser desorption ionization time-of-flight mass spectrometry for convenient and efficient N-glycan detection in human plasma
Source: Royal Society of Chemistry journal article supplement (doi:10.1039/c9ay01730e), 2019-01-01
Supplement: c9ay01730e1.pdf [file c9ay01730e1.pdf]

**Chemical Derivatization Coupling with Matrix Assisted Laser  
Desorption Ionization Time-of-Flight Mass Spectrometry for  
Convenient and Efficient N-glycan Detection in Human Plasma**

H. H. Bai <sup>a</sup>, J. Liu <sup>a</sup>, X. Q. Cheng <sup>a</sup> and X. H. Wang <sup>a\*</sup>

<sup>a</sup> Phase I Clinical Trial Center, Capital Medical University Affiliated Beijing Shijitan  
Hospital, Beijing 100038, PR China

**\*Corresponding authors:**

\*E-mail: wangxinghe@yahoo.com (X. H. Wang)

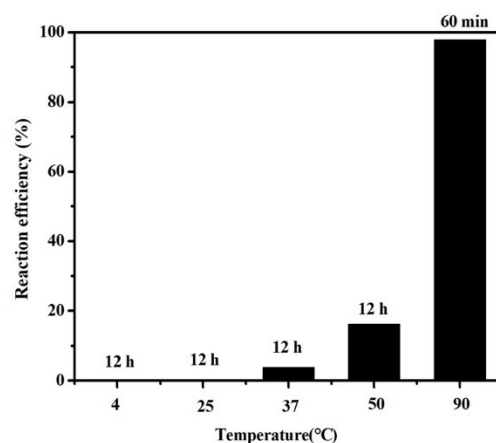

Fig. S1 The reaction efficiency of DP7 with PBH at different temperatures with a 1:50 molar ratio of DP7 to PBH and in the presence of 0.5% acetic acid for 60 min.

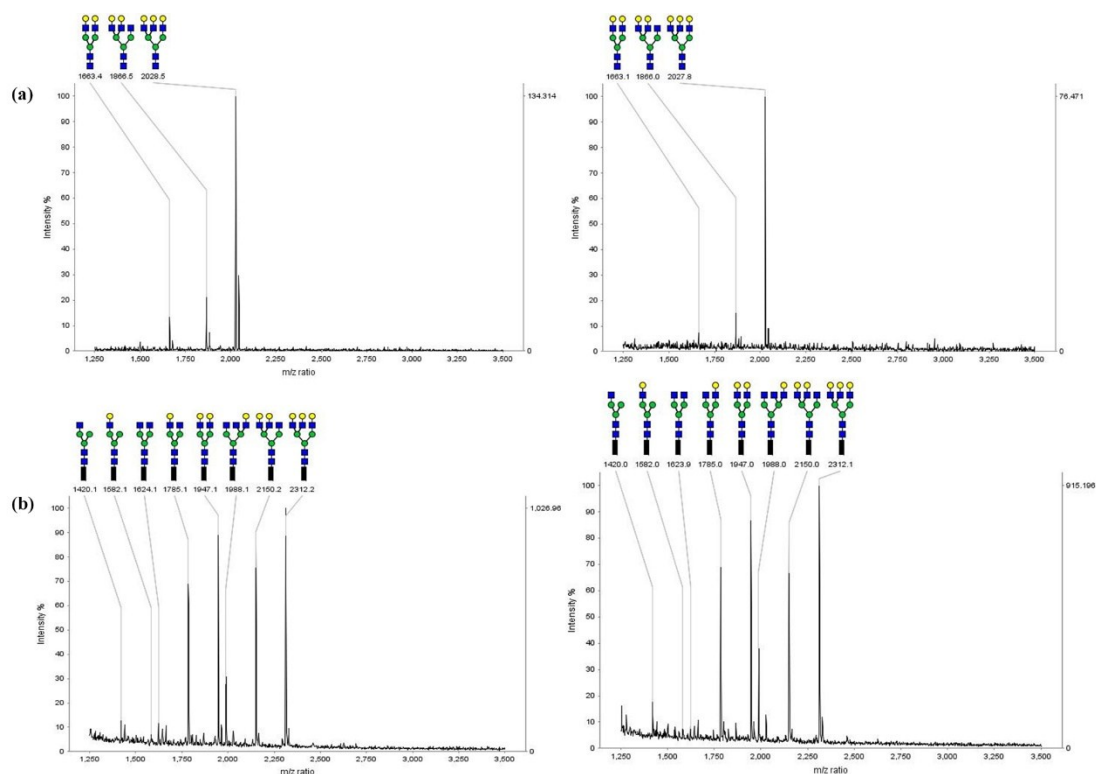

Fig. S2 MALDI-TOF MS spectra of N-glycans releasing from asialofetuin: direct analysis (a) and after derivatization by PBH (b) in two replicates.

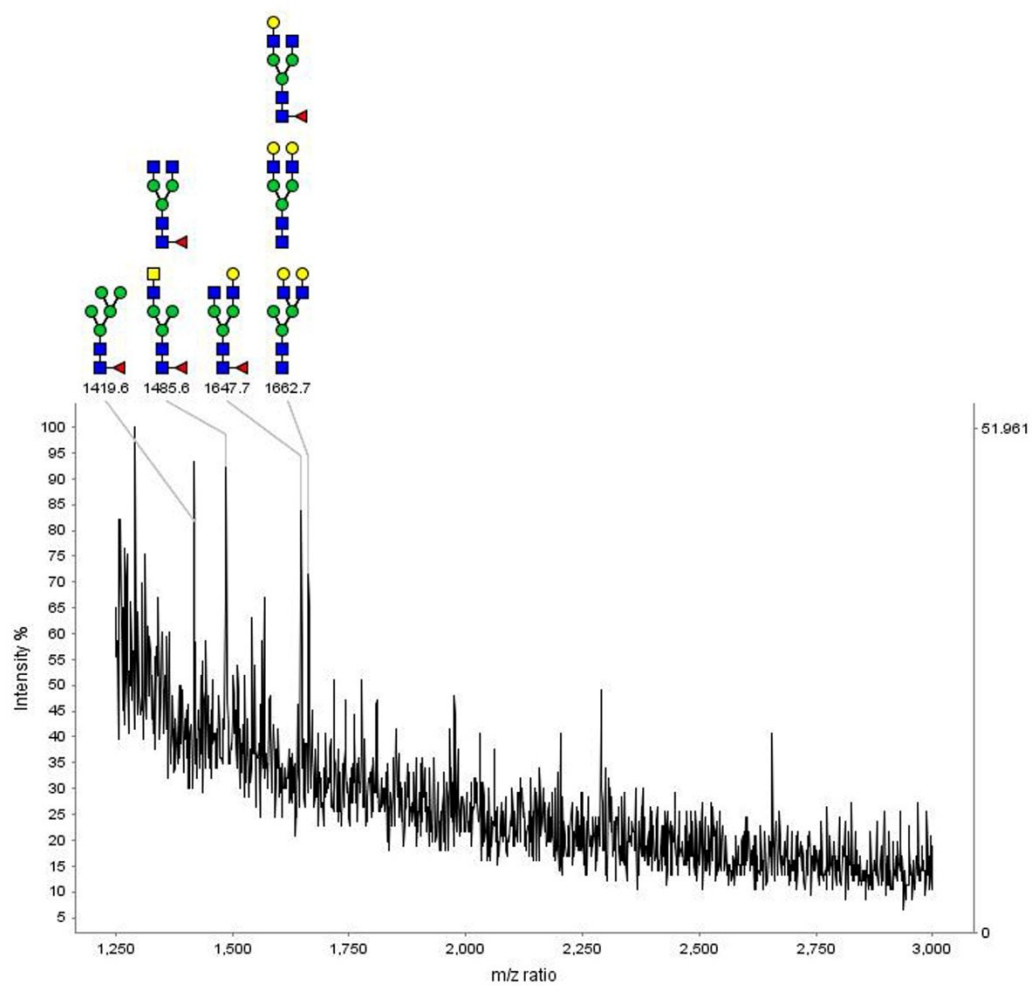

Fig. S3 MALDI-TOF MS spectra of N-glycans releasing from glycoproteins of human plasma by direct analysis
